# Supplementary material for: Ultrasensitive detection of SARS-CoV-2 spike protein by graphene field-effect transistors
Source: Royal Society of Chemistry journal article supplement (doi:10.1039/d2nr05103f), 2022-12-16
Supplement: d2nr05103f1.pdf [file d2nr05103f1.pdf]

## Supporting Information

# Ultrasensitive Detection of SARS-CoV-2 Spike Protein by Graphene Field-Effect Transistors

*Alessandro Silvestri,<sup>†a</sup> Julian Zayas-Arrabal,<sup>†a,#</sup> Mariano Vera-Hidalgo,<sup>a</sup> Desire Di Silvio,<sup>a</sup> Cecilia Wetzl,<sup>a,b</sup> Marta Martinez-Moro,<sup>a</sup> Amaia Zurutuza,<sup>c</sup> Elias Torres,<sup>c</sup> Alba Centeno,<sup>c</sup> Arantxa Maestre,<sup>c</sup> Juan Manuel Gómez,<sup>c</sup> María Arrastua,<sup>c</sup> Marta Elicegui,<sup>c</sup> Nerea Ontoso,<sup>c</sup> Maurizio Prato,<sup>a,d,e,\*</sup> Ivan Coluzza,<sup>\*f,e</sup> Alejandro Criado,<sup>\*g,a</sup>*

<sup>a</sup> Center for Cooperative Research in Biomaterials (CIC biomaGUNE), Basque Research and Technology Alliance (BRTA), Paseo de Miramon 194, 20014 Donostia-San Sebastián, Spain. Email: mprato@cicbiomagune.es

<sup>b</sup> University of the Basque Country UPV-EHU, 20018 Donostia-San Sebastián, Spain

<sup>c</sup> Graphenea Semiconductor SLU., Paseo Mikeletegi 83, 20009 San Sebastián, Spain.

<sup>d</sup> Department of Chemical and Pharmaceutical Sciences, University of Trieste, Via L. Giorgieri 1, 3412 7 Trieste, Italy

<sup>e</sup> Ikerbasque, Basque Foundation for Science, 48013 Bilbao, Spain

<sup>f</sup> BCMaterials, Basque Center for Materials, Applications and Nanostructures, Bld. Martina Casiano, UPV/EHU Science Park, Barrio Sarriena s/n, 48940 Leioa, Spain. Email: ivan.coluzza@bcmaterials.net

<sup>g</sup> Universidade da Coruña, CICA – Centro Interdisciplinar de Química e Bioloxía, Rúa as Carballeiras, 15071 A Coruña, Spain. E-mail: a.criado@udc.es

<sup>†</sup> These authors contributed equally to the work

<sup>#</sup> J. Z.-A.'s current address is: Departamento de Pediatría, Universidad del País Vasco UPV/EHU, 20014 San Sebastian, Spain.

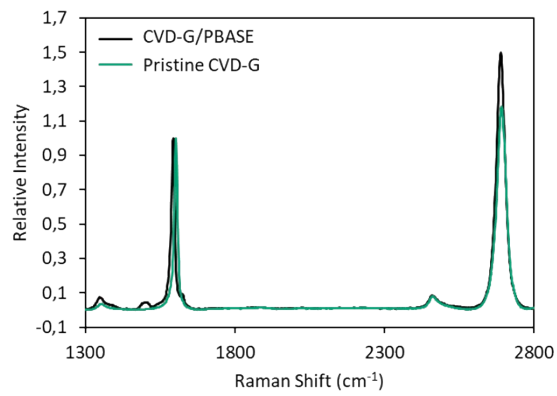

**Figure S1.** Raman spectra of Pristine CVD-G and CVD-G/PBASE.

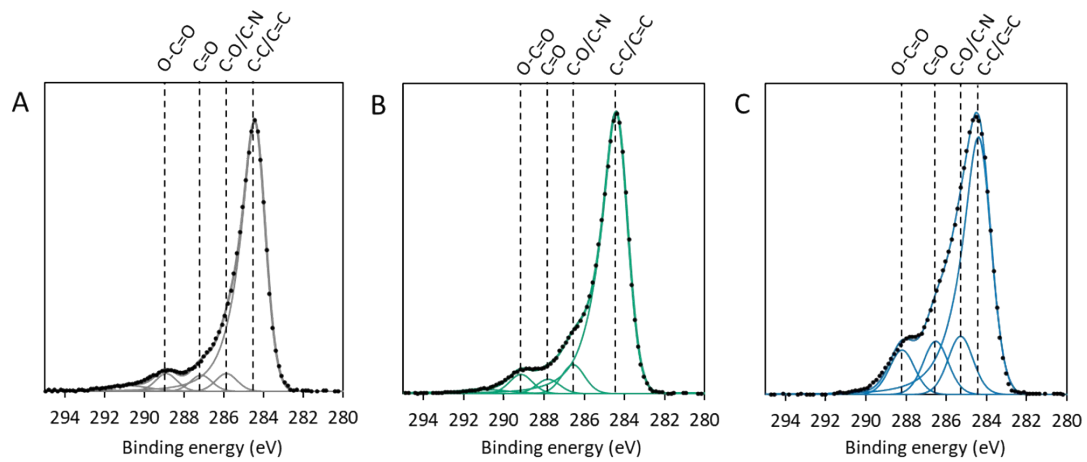

**Figure S2.** High resolution XPS spectra of the C 1s core of Pristine CVD-G, CVD-G/PBASE, CVD-G/PBASE/ACE2.

**Figure S3.** Repeatability of functionalisation of 3 CVD-G samples with PBASE. Three parameters were monitored:

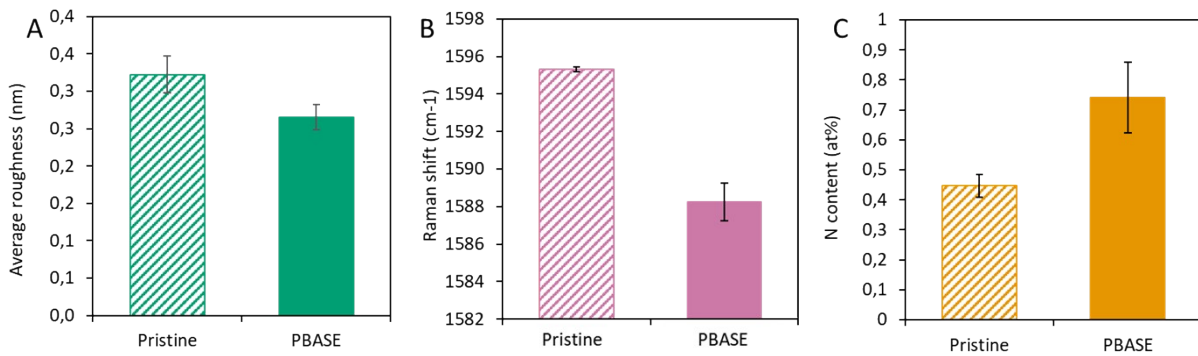

Average roughness by AFM (A), shift of the G band at Raman (B) and nitrogen content by XPS (C).

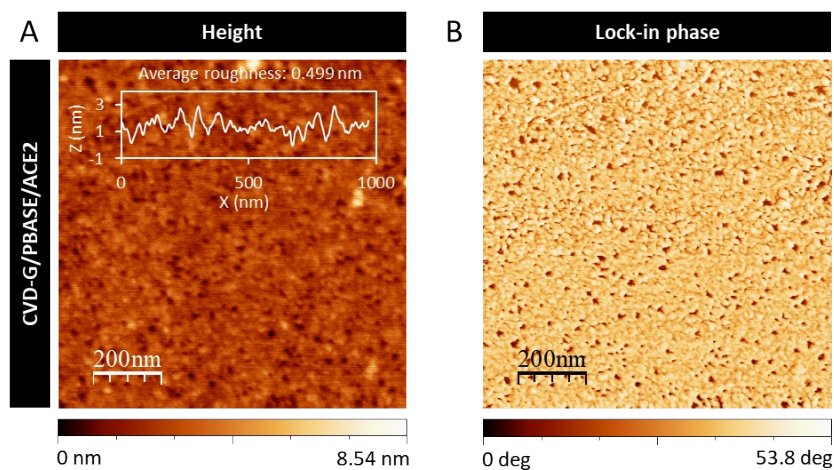

**Figure S4.** AFM height (A) and lock-in phase (B) micrographs of CVD-G/PBASE/ACE2.

### Modelling ACE2

In order to determine the distribution of charges on ACE2 protein, we use the PDB2PQR server using AMBER forcefield at pH 7.4.<sup>[1,2]</sup> The pKa of the pH sensitive residues of the protein is calculated with the PDB2PQR web server which, at a desired pH, calculates the pKa that each HIS, ASP and GLU residue of a protein would have based on hydrogen bonding, local energetics, and model pKa values.<sup>[1]</sup> PropKa tool was also used for this purpose.<sup>[3]</sup> State of the art estimation of the protonation state of the residue uses classical approaches with remarkable accurate results. According to our simulations the total charge at pH 7.0 is -28 elementary charges or  $44.86 \times 10^{-19}$  Coulombs.<sup>[3-6]</sup>

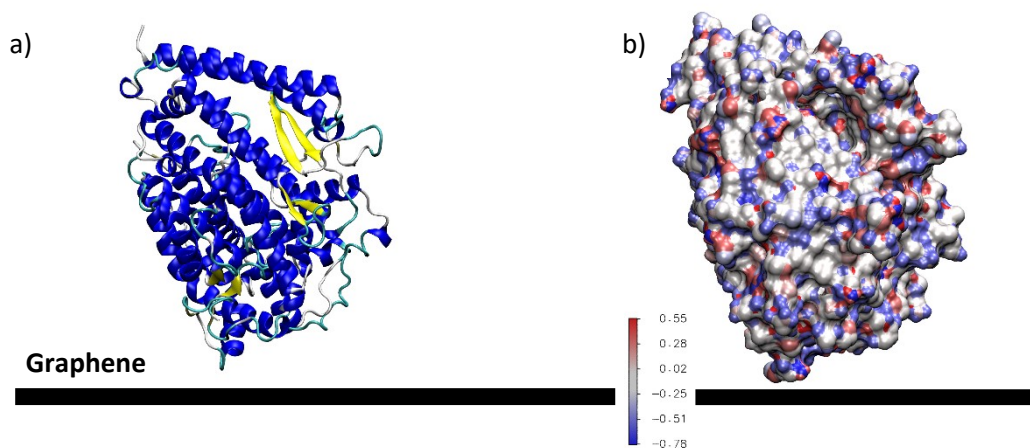

**Figure S5.** Extracellular section of the Angiotensin-converting enzyme 2 (ACE2) protein obtained from x-ray crystallographic data (PDB id. 1R42). a) Highlight of the secondary structure of ACE2 Alpha-Helix (Blue), Beta Sheets (yellow) and Random Loops (cyan). b) Charge distribution on the surface of the ACE2.

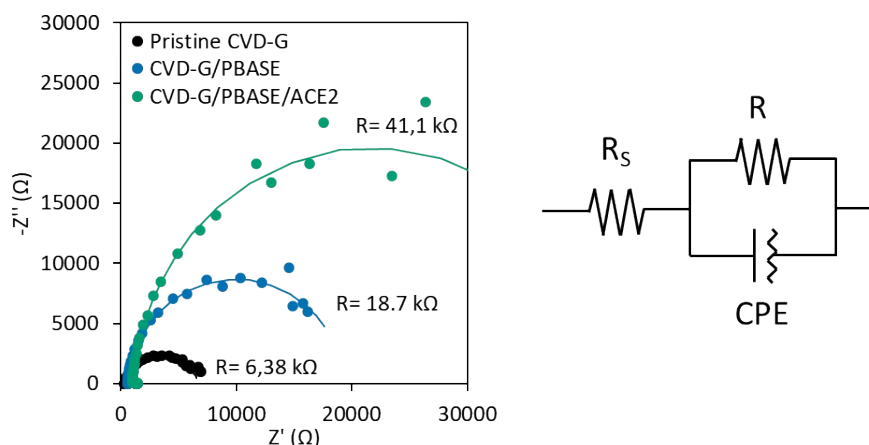

**Figure S6.** Electrochemical impedance spectroscopy (EIS) measurements of Pristine CVD-G (black), CVD-G/PBASE (blue) and CVD-G/PBASE/ACE2 green. The resistance of each sample has been obtained by fitting the data with the reported equivalent circuit.

## Quantification of the functionalisation density by QCM

### Experimental functionalisation density for PBASE

The functionalisation degree of CVD-G with PBASE was studied by QCM microbalance. A  $t_0$  EtOH was flown over a QCM crystal on top of which was deposited a monolayer of CVD-G. At  $t_1$  the flow was exchanged for a PBASE 1mM solution in ethanol. A sudden drop in the crystal frequency was observed due to the absorption of PBASE on top of graphene. At  $t_2$  a stream of EtOH was flown on top of the crystal to clean the surface and remove the unabsorbed PBASE. The variation of the frequency (for  $n=3$   $\Delta f$ ) after functionalisation and cleaning steps is equal to 17.97 Hz (Figure S5).  $\Delta f$  can be correlated to the variation in mass ( $\Delta m$ ) applying equation S1

**Eq S1.**

$$\Delta m = -\frac{A\sqrt{\rho_q\mu_q}}{2f_0^2}\Delta f$$

**Eq S2.**

$$\Delta m = -\frac{cte}{n}\Delta f$$

**Eq S3.**

$$\Delta m = \frac{17.7}{n}\Delta f$$

From  $\Delta m$ , equal 106.04 ng  $\text{cm}^{-2}$ , the number of molecules per  $\text{nm}^2$  can be calculated by applying Eq. S4:

**Eq S4.**

$$N = \frac{\Delta m}{MW_{PBASE}}$$

Which it is equal to 1.62 molecules per  $\text{nm}^2$

### Expected functionalisation density for PBASE monolayer

The expected functionalisation density for PBASE monolayer has been calculated approximating the PBASE footprint to the area occupied by 1 pyrene moiety (Eq. S5, Figure S6).

**Eq S4.**

$$A = 4d \cos 30 (2d + 3d \sin 30) = 0.262 \text{ nm}^2$$

Where d is the distance among two C atoms in an aromatic ring.

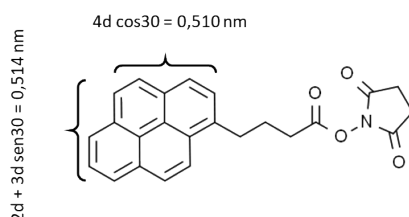

Therefore, the expected functionalisation density is equal to 3.81 molecule per nm<sup>2</sup>

### Experimental functionalisation density for ACE2

The ACE2 receptor density has been calculated from the frequency shift of the QCM balance as described previously for ACE2. At  $t_0$  a PBS flow was stream over a QCM crystal coated with CVD-G/PBASE. At  $t_1$  the At  $t_1$  the flow was exchanged for a ACE2 10  $\mu\text{g/ml}$  solution in PBS. At  $t_2$  PBS solution was flown to clean the sensor surface. However, being the ACE2 covalently linked to PBASE, and the whole functionalisation highly stable, no increase in the frequency was notices upon washing. The  $\Delta f$  after ACE2 immobilisation was of 10.15 (Figure S7).  $\Delta m$  was calculated to be 18.88  $\text{ng cm}^{-2}$ , by applying Eq S3, corresponding to a density of 0.0043 receptors per nm<sup>2</sup>

### Expected functionalisation density for ACE2 monolayer

The expected functionalisation density for ACE2 monolayer has been calculated approximating the PBASE footprint to the area occupied by a circle with a radius equal to ACE2 hydrodynamic radius ( $R_h=5.04\text{nm}$ ;  $A=79.76 \text{ nm}^2$ ).<sup>[7]</sup> Therefore, the expected receptor density is equal to 0.012 proteins per nm<sup>-2</sup>.

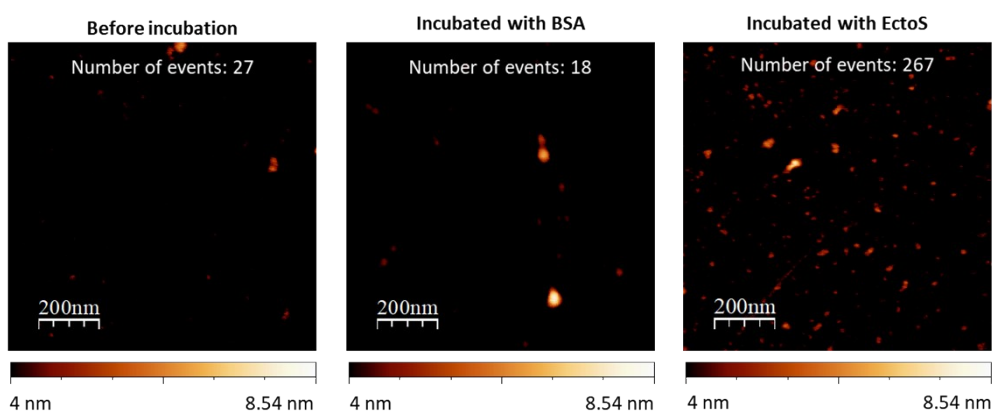

**Figure S7.** Height AFM images filtered with a low-pass cutoff of 4nm, to highlight the events imputable to the presence of proteins adsorbed on the surface.

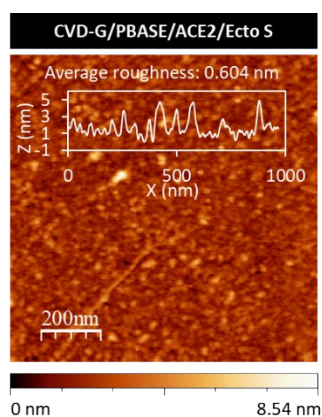

**Figure S8.** Height AFM micrograph of CVD-G/PBASE/ACE2 surface after incubation with Ecto S.

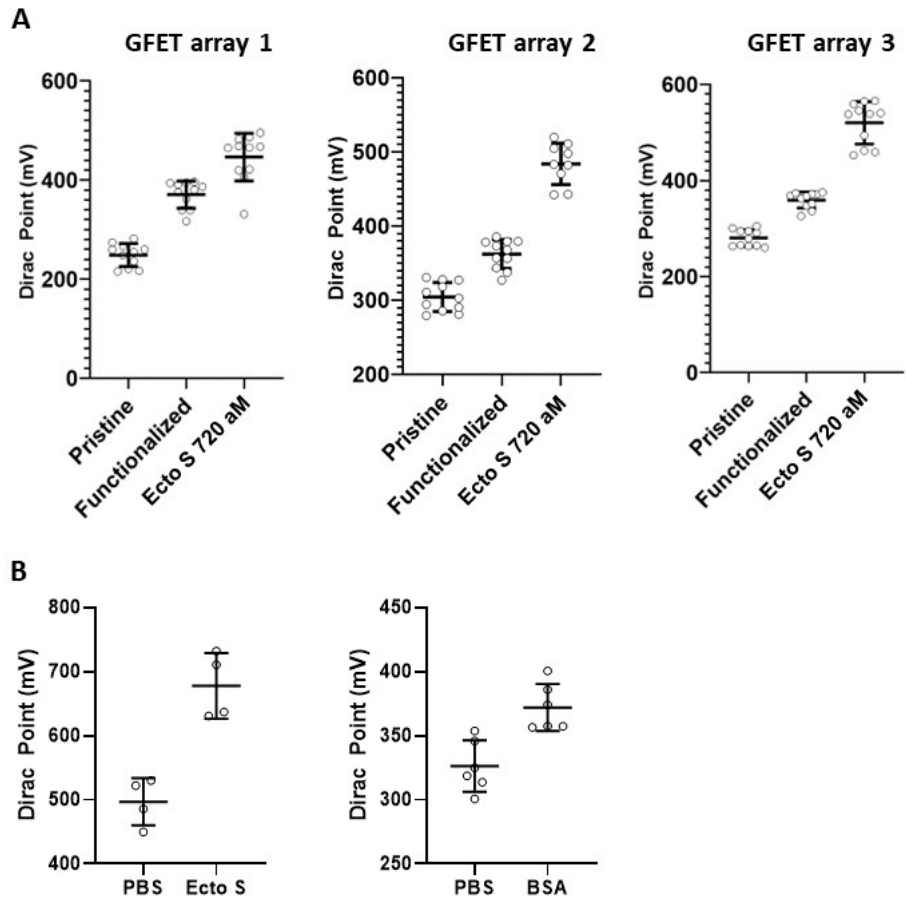

**Figure S9.** A)  $V_{\text{CNP}}$  for three different GFET arrays, each composed of 12 microtransistors. The  $V_{\text{CNP}}$  of each microtransistor was registered with graphene as pristine material, after its functionalization with ACE2 and then in presence of Ecto S at 720 aM. B)  $V_{\text{CNP}}$  of 4 microtransistors of a GFET array in PBS and in presence of Ecto S at 720 aM in PBS (left), and  $V_{\text{CNP}}$  of 6 microtransistors of a GFET array in PBS and in presence of BSA at 720 aM in PBS (right).

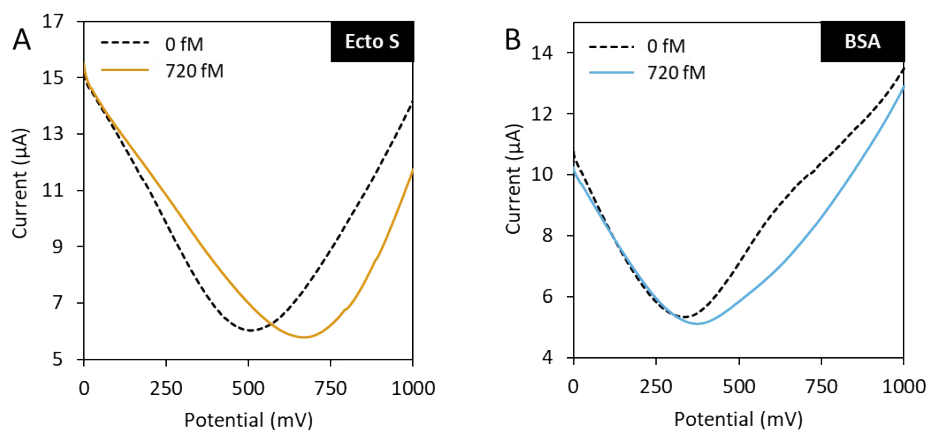

**Figure S10.** Transfer curves of GFET/PBASE/ACE2 devices in presence and absence of 720 fM Ecto S (A) and BSA (B).

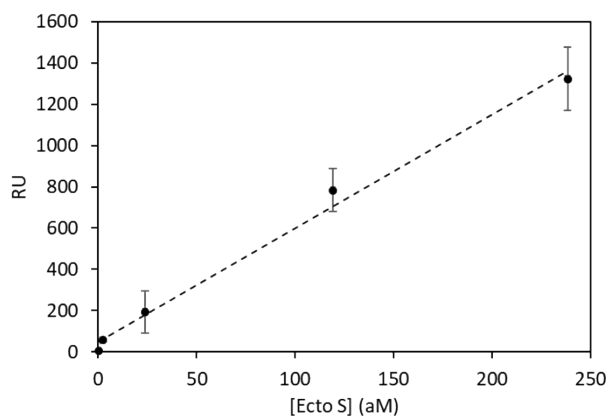

**Figure S11.** Change of SPR signal as function of Ecto S protein concentration.

## REFERENCES

- [1] M. H. M. Olsson, C. R. S ndergaard, M. Rostkowski, J. H. Jensen, *J. Chem. Theory Comput.* **2011**, *7*, 525.
- [2] E. S. Cunha, P. Sfriso, A. L. Rojas, A. Hospital, M. Orozco, N. G. A. Abrescia, *Structure* **2017**, *25*, 53.
- [3] T. J. Dolinsky, J. E. Nielsen, J. A. McCammon, N. A. Baker, *Nucleic Acids Res.* **2004**, *32*, 665.
- [4] S. Donnini, F. Tegeler, G. Groenhof, H. Grubm ller, *J. Chem. Theory Comput.* **2011**, *7*, 1962.
- [5] A. Allouche, *J. Comput. Chem.* **2012**, *32*, 174.
- [6] X. Kong, C. L. Brooks, *J. Chem. Phys.* **1996**, *105*, 2414.
- [7] M. M. Schneider, M. Emmenegger, C. K. Xu, I. C. Morales, G. Meisl, P. Turelli, C. Zografou, M. R. Zimmermann, B. M. Frey, S. Fiedler, V. Denninger, R. P. B. Jacquat, L. Madrigal, A. Ilsley, V. Kosmoliaptsis, H. Fiegler, D. Trono, T. P. J. Knowles, A. Aguzzi, *Life Sci. Alliance* **2022**, *5*, 1.
